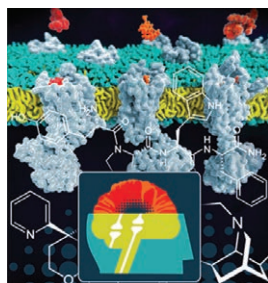

## ON THE COVER:

New scientific discoveries are emerging in the field of opioid pharmacology at the same time the United States is responding to a surge in prescription opioid misuse. "Frontiers in Opioid Pharmacology," the 2017 ANESTHESIOLOGY Journal Symposium held during the American Society of Anesthesiologists Annual Meeting, highlighted many of these new scientific discoveries. In this issue of ANESTHESIOLOGY, readers will find articles describing new original laboratory and clinical research, retrospective and population studies with practice and policy implications, and reviews on a number of topics related to the pharmacology and clinical use of opioid analgesics. Many of these are written by anesthesiologists that are leading clinician-scientists in our field. We invite you to read and learn more from the *Frontiers in Opioid Pharmacology*. Cover illustration by Sara Jarret, C.M.I.; opioid receptor illustration ©ThinkStock; Journal Symposium logo by Annemarie Johnson, Vivo Visuals.

## Editorial Views

- Rathmell and Kharasch: Frontiers in Opioid Pharmacology, p. 865
- Henthorn and Mikulich-Gilbertson:  $\mu$ -Opioid Receptor Agonists: Do They Have Utility in the Treatment of Acute Pain? p. 867

## Original Investigations

- Gupta *et al.*: Opioid Abuse or Dependence Increases 30-day Readmission Rates after Major Operating Room Procedures: A National Readmissions Database Study, p. 880
- Memtsoudis *et al.*: Association of Multimodal Pain Management Strategies with Perioperative Outcomes and Resource Utilization: A Population-based Study, p. 891
- Birkholz *et al.*: Influence of Cardiac Output on the Pharmacokinetics of Sufentanil in Anesthetized Pigs, p. 912
- Roozkrans *et al.*: Benefit *versus* Severe Side Effects of Opioid Analgesia: Novel Utility Functions of Probability of Analgesia and Respiratory Depression, p. 932
- Fisher *et al.*: Pharmacokinetic Properties of a Sufentanil Sublingual Tablet Intended to Treat Acute Pain, p. 943
- Chai *et al.*: New Opioid Analgesic Approvals and Outpatient Utilization of Opioid Analgesics in the United States, 1997 through 2015, p. 953
- Klein *et al.*: Overexpression of  $\mu$ -Opioid Receptors in Peripheral Afferents, but Not in Combination with Enkephalin, Decreases Neuropathic Pain Behavior and Enhances Opioid Analgesia in Mouse, p. 967
- Angel *et al.*: Buprenorphine Depresses Respiratory Variability in Obese Mice with Altered Leptin Signaling, p. 984
- Toyama *et al.*: Nonpeptide Orexin-2 Receptor Agonist Attenuates Morphine-induced Sedative Effects in Rats, p. 992

## Review Articles

- Litman *et al.*: Abuse-deterrent Opioid Formulations, p. 1015
- Dahan *et al.*: Averting Opioid-induced Respiratory Depression without Affecting Analgesia, p. 1027

## ◆ THIS MONTH IN ANESTHESIOLOGY

1A

## ■ SCIENCE, MEDICINE, AND THE ANESTHESIOLOGIST

15A

## ■ INFOGRAPHICS IN ANESTHESIOLOGY

19A

◆ Refers to This Month in Anesthesiology

◆ Refers to Editorial Views

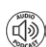

This article has an Audio Podcast

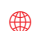

See Supplemental Digital Content

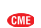

CME Article

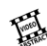

This article has a Video Abstract

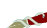

Part of the Letheon writing competition

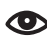

This article has a Visual Abstract

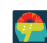

Frontiers in Opioid Pharmacotherapy Symposium

# CONTENTS

## EDITORIAL VIEWS

-  **Frontiers in Opioid Pharmacology** 865  
*J. P. Rathmell and E. D. Kharasch*
-  **µ-Opioid Receptor Agonists: Do They Have Utility in the Treatment of Acute Pain?** 867  
*T. K. Henthorn and S. K. Mikulich-Gilbertson*
- The Heat Is On: Clinical Implications of Intraoperative Thermoregulation Research** 871  
*D. A. Story*

## SPECIAL ARTICLE

- Does Aerobic Respiration Produce Carbon Dioxide or Hydrogen Ion and Bicarbonate?** 873  
*E. R. Swenson*

The acidic end-product of aerobic metabolism is generally accepted to be carbon dioxide, but it is instead entirely possible that hydrogen ion and bicarbonate may be produced initially by the several Krebs cycle decarboxylating enzymes in the mitochondria. The greater intracellular acidosis following inhibition of carbonic anhydrase by acetazolamide is argued by two experts in acid-base physiology and function of carbonic anhydrase to support either biochemistry. In the first instance, carbonic anhydrase catalyzes bicarbonate formation to codiffuse with carbon dioxide through the cell to speed carbon dioxide elimination and prevent hypercapnic acidosis or in the second scenario to immediately speed the formation of carbon dioxide from hydrogen and bicarbonate to lower the hydrogen ion concentration.

## PERIOPERATIVE MEDICINE

### CLINICAL SCIENCE

-  **Opioid Abuse or Dependence Increases 30-day Readmission Rates after Major Operating Room Procedures: A National Readmissions Database Study** 880  
*A. Gupta, J. Nizamuddin, D. Elmofty, S. L. Nizamuddin, A. Tung, M. Minhaj, A. Mueller, J. Apfelbaum, and S. Shahul*

The National Readmission Database for 2013 and 2014 was analyzed to compare readmission rates in patients with or without opioid abuse or dependence undergoing major operating room diagnostic or therapeutic procedures. Patients with opioid abuse or dependence had higher 30-day readmission rates (11.1% *vs.* 9.1%). Readmissions for infection, opioid overdose, and acute pain were more common in patients with opioid abuse or dependence.

-  **Association of Multimodal Pain Management Strategies with Perioperative Outcomes and Resource Utilization: A Population-based Study** 891  
*S. G. Memtsoudis, J. Poeran, N. Zubizarreta, C. Cozowicz, E. E. Mörwald, E. R. Mariano, and M. Mazumdar*

Using a Premier Perspective database of total hip and knee arthroplasties, patients were grouped into “opioids only” and 1, 2, or more than 2 additional modalities. There was a stepwise modality number-associated decrease in opioid patient-controlled analgesia use, opioid prescriptions, and some opioid-related side effects, but not cost of hospitalization. The strongest association was for cyclooxygenase-2 inhibitors and nonsteroidal antiinflammatory drugs.

-  **Effects of Ambient Temperature and Forced-air Warming on Intraoperative Core Temperature: A Factorial Randomized Trial** 903  
*L. Pei, Y. Huang, Y. Xu, Y. Zheng, X. Sang, X. Zhou, S. Li, G. Mao, E. J. Mascha, and D. I. Sessler*

Ambient operating room temperature has a negligible effect on core temperature for forced-air warmed patients, and only a small effect on unwarmed patients.

## BASIC SCIENCE

-  **Influence of Cardiac Output on the Pharmacokinetics of Sufentanil in Anesthetized Pigs** 912  
T. Birkholz, C. Leuthold, J. Schmidt, H. Ihmsen, J. Schüttler, and C. Jeletzov

In 20 anesthetized pigs randomly assigned to have the pharmacokinetics of intravenously administered sufentanil studied under low, high, or normal cardiac output conditions, sufentanil intercompartmental clearance, compartmental volumes, and elimination clearance increased with cardiac output. As a result of cardiac output-related changes in pharmacokinetics, simulated sufentanil doses required to maintain a target plasma concentration increased with increasing cardiac output, as did its context-sensitive half-times.

- Dexmedetomidine Prevents Cognitive Decline by Enhancing Resolution of High Mobility Group Box 1 Protein–induced Inflammation through a Vagomimetic Action in Mice** 921  
J. Hu, S. Vacas, X. Feng, D. Lutrin, Y. Uchida, I. K. Lai, and M. Maze

In a preclinical model, dexmedetomidine prevented cognitive deficits resulting from administration of high molecular group box 1 protein *via* both vagomimetic and humoral pathways. The results are consistent with the notion that the cognitive deficits noted after surgery or medical illness may be prevented by the administration of dexmedetomidine.

## ■ PAIN MEDICINE

## CLINICAL SCIENCE

-  **Benefit *versus* Severe Side Effects of Opioid Analgesia: Novel Utility Functions of Probability of Analgesia and Respiratory Depression** 932  
  M. Roozkrans, R. van der Schrier, L. Aarts, E. Sarton, M. van Velzen, M. Niesters, A. Dahan, and E. Olofsen

The concept of the utility function was further developed for alfentanil by calculating the probabilities of adequate analgesia with or without respiratory depression and the probabilities of inadequate analgesia with or without respiratory depression using data from three studies of 48 patients. A 50% decrease in minute ventilation was taken as the threshold for severe respiratory depression and both 25% and 50% increases in tolerated electrical current were thresholds for analgesia. The probabilities of the four conditions varied with alfentanil effect-site concentrations.

-  **Pharmacokinetic Properties of a Sufentanil Sublingual Tablet Intended to Treat Acute Pain** 943  
D. M. Fisher, P. Chang, D. R. Wada, A. Dahan, and P. P. Palmer

With sublingual administration of a newly developed 30- $\mu$ g sufentanil tablet, the time to maximum plasma concentration was approximately 1 h, but the analgesic threshold was typically reached at or before 30 min, which is consistent with the onset of analgesia observed in clinical trials of the 30- $\mu$ g product. The time for the plasma concentrations to decrease below the analgesic threshold after a single 30- $\mu$ g dose was approximately 3 h, which is consistent with the duration of analgesia in those published clinical trials.

-  **New Opioid Analgesic Approvals and Outpatient Utilization of Opioid Analgesics in the United States, 1997 through 2015** 953  
 G. Chai, J. Xu, J. Osterhout, M. A. Liberatore, K. L. Miller, C. Wolff, M. Cruz, P. Lurie, and G. Dal Pan

Data on new brand and generic opioid analgesic product approvals, and on retail dispensed prescription claims, were used to evaluate the opioid product space. Opioid prescriptions dispensed and amount per prescription nearly doubled, and total morphine milligram equivalents more than tripled, from 1997 to the peak in 2010, and partially declined thereafter. Generic products accounted for 68% of total opioid prescriptions in 1997 and 96% in 2015. Approval of new branded opioid products alone does not appear to be a primary driver of increased opioid prescribing.

# CONTENTS

## BASIC SCIENCE

-   **Overexpression of  $\mu$ -Opioid Receptors in Peripheral Afferents, but Not in Combination with Enkephalin, Decreases Neuropathic Pain Behavior and Enhances Opioid Analgesia in Mouse** 967  
*A. H. Klein, H. K. Mohammad, R. Ali, B. Peper, S. P. Wilson, S. N. Raja, M. Ringkamp, and S. Sweitzer*
- Using a mouse model of neuropathic pain, it was shown that increasing  $\mu$ -opioid receptor expression in peripheral neurons reduced nociceptor activity and left-shifted loperamide dose-response curves. Unexpectedly, inoculation with both  $\mu$ -opioid and preproenkephalin-containing herpes viruses was ineffective in reducing nerve injury-induced pain behaviors.
-  **Buprenorphine Depresses Respiratory Variability in Obese Mice with Altered Leptin Signaling** 984  
*C. Angel, Z. T. Glovak, W. Alami, S. Mihalko, J. Price, Y. Jiang, H. A. Baghdoyan, and R. Lydic*
- The hypothesis that sex, obesity, and leptin status modulate buprenorphine-induced changes in breathing was tested in male and female normal weight mice and in obese mice with disrupted leptin signaling. Leptin status, but not body weight or sex, contributed to the buprenorphine-induced decrease in minute ventilation variability. Mice with impaired leptin signaling had the largest buprenorphine-induced decrease in minute ventilation variability.
-   **Nonpeptide Orexin-2 Receptor Agonist Attenuates Morphine-induced Sedative Effects in Rats** 992  
*S. Toyama, N. Shimoyama, Y. Tagaito, H. Nagase, T. Saitoh, M. Yanagisawa, and M. Shimoyama*
- In a rat model, orexin-2 receptor agonists alleviated morphine-induced decreases in locomotor activity and in sedation, which was assessed by changes in electroencephalogram. Orexin-2 receptor agonists did not attenuate the analgesic effect of morphine.

## EDUCATION

## IMAGES IN ANESTHESIOLOGY

- Spinal Subdural Hematoma after Spinal Drain for Endovascular Thoracic Aortic Aneurysm Repair** 1004  
*H. Awad, T.-P. J. Huang, E. Tili, and E. Bourekas*
- Takayasu Arteritis and Complete Aortic Arch Branch Vessel Occlusions** 1005  
*S. M. Gillespie, S. M. Broski, and D. W. Barbara*
-  **Hemopericardium and Acute Cardiac Tamponade** 1006  
*S. Khanna and K. Maheshwari*
- Cervical Deformity and Potential Difficult Airway Management in Klippel–Feil Syndrome** 1007  
*M. Chura, N. Odo, E. Foley, and V. Bora*

## CLINICAL FOCUS REVIEW

-  **Neurologic Considerations and Complications Related to Liver Transplantation** 1008  
*S. S. Kumar, G. A. Mashour, and P. Picton*
- Neurologic complications of surgery can be devastating. The authors review neurologic considerations and complications associated with liver transplantation and discuss strategies to prevent, identify, and treat such adverse outcomes in the perioperative period.

## REVIEW ARTICLE

-  **Abuse-deterrent Opioid Formulations** 1015  
*R. S. Litman, O. H. Pagán, and T. J. Cicero*

The review focuses on the pharmacology of abuse-deterrent opioid formulations and discusses evidence for their use in preventing opioid overdose and addiction.

-  **Averting Opioid-induced Respiratory Depression without Affecting Analgesia** 1027  
*A. Dahan, R. van der Schrier, T. Smith, L. Aarts, M. van Velzen, and M. Niesters*

Effective respiratory stimulants prevent opioid-induced respiratory depression without affecting the analgesic opioid response. Here the authors discuss drugs acting within the brainstem respiratory network and those acting at the carotid bodies.

## MIND TO MIND

-  **Your Anesthesiologist Self** 1038  
*A. Shafer*
- Fear in Perspective** 1040  
*M. F. Chisholm*

## CORRESPONDENCE

- Challenge of the Mini-fluid Challenge: Filling Twice without Creating a Self-fulfilling Prophecy Design** 1043  
*S. T. Vistisen and T. W. L. Scheeren*

- In Reply**  
*H. de Courson, M. Sesay, K. Nouette-Gaulain, and M. Biais*

- Assessing Glucose Meter Accuracy: The Details Matter!** 1044  
*Y. Liang and M. J. Rice*

- In Reply**  
*B. S. Karon, L. J. Donato, C. M. (Larsen) Mogensen, L. K. Siebenaler, A. E. Wells, C. M. Wood-Wentz, M. E. Marienau, and T. B. Curry*

- Pump-and-Dump; Anesthesiologists Lead the Feed** 1046  
*S. E. Dodd and E. E. Sharpe*

- In Ultrasound Images, All That Is Black Is Not Always Fluid** 1047  
*R. Gorski and H. Shankar*

- Method for Intraarticular Knee Injection** 1048  
*D. M. Cushman and J. C. Bosley*

## CONTENTS

### ■ ERRATUM

1049

### ■ CAREERS & EVENTS

21A

## INSTRUCTIONS FOR AUTHORS

The most recently updated version of the Instructions for Authors is available at [www.anesthesiology.org](http://www.anesthesiology.org). Please refer to the Instructions for the preparation of any material for submission to ANESTHESIOLOGY.

Manuscripts submitted for consideration for publication must be submitted in electronic format. The preferred method is via the Journal's Web site (<http://www.anesthesiology.org>). Detailed directions for submissions and the most recent version of the Instructions for Authors can be found on the Web site (<http://www.anesthesiology.org>). Books and educational materials should be sent to Alan Jay Schwartz, M.D., M.S.Ed., Director of Education, Department of Anesthesiology and Critical Care Medicine, The Children's Hospital of Philadelphia, 34th Street and Civic Center Blvd., Room 9327, Philadelphia, Pennsylvania 19104-4399. Article-specific permission requests are managed with Copyright Clearance Center's Rightslink service. Information can be accessed directly from articles on the journal Web site. More information is available at <http://anesthesiology.pubs.asahq.org/public/rightsandpermissions.aspx>. Advertising and related correspondence should be addressed to Advertising Manager, ANESTHESIOLOGY, Wolters Kluwer Health, Inc., Two Commerce Square, 2001 Market Street, Philadelphia, Pennsylvania 19103 (Web site: <http://www.wkadcenter.com/>). Publication of an advertisement in ANESTHESIOLOGY does not constitute endorsement by the Society or Wolters Kluwer Health, Inc. of the product or service described therein or of any representations made by the advertiser with respect to the product or service.

**ANESTHESIOLOGY** (ISSN 0003-3022) is published monthly by Wolters Kluwer Health, Inc., 14700 Citicorp Drive, Bldg 3, Hagerstown, MD 21742. Business office: Two Commerce Square, 2001 Market Street, Philadelphia, PA 19103. Periodicals postage paid at Hagerstown, MD, and at additional mailing offices. Copyright © 2018, the American Society of Anesthesiologists, Inc.

**Annual Subscription Rates:** *United States*—\$930 Individual, \$2054 Institution, \$374 In-training. *Rest of World*—\$981 Individual, \$2281 Institution, \$374 In-training. Single copy rate \$207. Subscriptions outside of North America must add \$55 for airfreight delivery. Add state sales tax, where applicable. The GST tax of 7% must be added to all orders shipped to Canada (Wolters Kluwer Health, Inc.'s GST Identification #895524239, Publications Mail Agreement #1119672). Indicate in-training status and name of institution. Institution rates apply to libraries, hospitals, corporations, and partnerships of three or more individuals. Subscription prices outside the United States must be prepaid. Prices subject to change without notice. Subscriptions will begin with currently available issue unless otherwise requested. Visit us online at [www.lww.com](http://www.lww.com).

Individual and in-training subscription rates include print and access to the online version. Online-only subscriptions for individuals (\$308) and persons in training (\$308) are available to nonmembers and may be ordered by downloading a copy of the Online Subscription FAXback Form from the Web site, completing the information requested, and faxing the completed form to 301-223-2400. Institutional rates are for print only; online subscriptions are available via Ovid. Institutions can choose to purchase a print and online subscription together for a discounted rate. Institutions that wish to purchase a print subscription, please contact Wolters Kluwer Health, Inc., 14700 Citicorp Drive, Bldg 3, Hagerstown, MD 21742; phone: 800-638-3030; fax: 301-223-2400. Institutions that wish to purchase an online

subscription or online with print, please contact the Ovid Regional Sales Office near you or visit [www.ovid.com/site/index.jsp](http://www.ovid.com/site/index.jsp) and select Contact and Locations.

**Address for non-member subscription information, orders, or change of address** (except Japan): Wolters Kluwer Health, Inc., 14700 Citicorp Drive, Bldg 3, Hagerstown, MD 21742; phone: 800-638-3030; fax: 301-223-2400. In Japan, contact Wolters Kluwer Health Japan Co., Ltd., Forecast Mita Building 5th floor, 1-3-31 Mita Minato-ku, Tokyo, Japan 108-0073; phone: +81 3 5427 1969; email: [journal@wkjapan.co.jp](mailto:journal@wkjapan.co.jp).

**Address for member subscription information, orders, or change of address:** Members of the American Society of Anesthesiologists receive the print and online journal with their membership. To become a member or provide a change of address, please contact the American Society of Anesthesiologists, 1061 American Lane, Schaumburg, Illinois 60173-4973; phone: 847-825-5586; fax: 847-825-1692; email: [membership@ASAhq.org](mailto:membership@ASAhq.org). For all other membership inquiries, contact Wolters Kluwer Health, Inc., Customer Service Department, P.O. Box 1610, Hagerstown, MD 21740; phone: 800-638-3030; fax: 301-223-2400.

**Postmaster:** Send address changes to ANESTHESIOLOGY, P.O. BOX 1610, Hagerstown, MD 21740.

**Advertising:** Please contact Hilary Druker, Advertising Field Sales Representative, Health Learning, Research & Practice, Medical Journals, Wolters Kluwer Health, Inc.; phone: 609-304-9187; e-mail: [Hilary.Druker@wolterskluwer.com](mailto:Hilary.Druker@wolterskluwer.com). For classified advertising: Joe Anzuena, Recruitment Advertising Representative, Wolters Kluwer Health, Inc., Two Commerce Square, 2001 Market Street, Philadelphia, PA 19103; phone: 215-521-8532; fax: 215-701-2410; e-mail: [Joe.Anuena@wolterskluwer.com](mailto:Joe.Anuena@wolterskluwer.com).
